# Supplementary material for: Antimicrobial Properties of Compounds Isolated from Syzygium malaccense (L.) Merr. and L.M. Perry and Medicinal Plants Used in French Polynesia
Source: MDPI journal article supplement (doi:10.3390/life12050733), 2022-05-14
Supplement: s1 [file s1]

## Supplementary data

Table S1. Medicinal plants cited in the survey but not collected, with their medicinal uses.

Parts used: leaf (l.); fruit (f.); flower (fl.); bud (b.); bark (bk.); whole plant (w.p.); rhizome (rh.); root (r.); aerial part (a.p.); aerial root (a.r.); stem (st.); almond (alm.); latex of fig (l.f.). Route of administration-preparation: Per os (Po); Cataplasma (Cat); Gargle (Garg); Inhalation (Inh). Medicinal uses (abbreviations and specifications): **V. Cutaneous symptoms** (spots, rash, erysipelas, folliculitis), **Pneumo.** (bronchitis; cough; pneumonia); **V. diseases** (general infectious diseases), **STD** (Sexually transmitted disease: malodorous yellow-greenish genital flow, genital itching...), **Uterus** (care post-partum, "impure" menstruation), **Burn** (sunburn sometimes with headache and dehydration), **Purge** (diet between ra'au tahiti and conventional medicinal drug), **"Crumpled lung"** (crumpled lung provoking cough and pain), **Umbilic.** (care of umbilical cord).

| Latin name<br>"vernacular name" (Botanical family)<br>(number of citation), <b>plant collected in bold</b> | Health problem category (part used; mode of administration)                                                                                                                                                                                                              |
|------------------------------------------------------------------------------------------------------------|--------------------------------------------------------------------------------------------------------------------------------------------------------------------------------------------------------------------------------------------------------------------------|
| <i>Achyranthes aspera</i> L. var. <i>aspera</i> "aerofai" (Amaranthaceae) (3)                              | <b>Pneumo.</b> (l. or w.p.; Po), <b>Tonsillitis</b> (b.; Garg and Po)                                                                                                                                                                                                    |
| <i>Acrostichum aureum</i> L.<br>"fa'ato" (Pteridaceae) (1)                                                 | <b>Furunculosis, Pustule</b> (Young frond; Cat)                                                                                                                                                                                                                          |
| <i>Artocarpus altilis</i> (Parkinson) Fosberg<br>"uru pae'a" (Moraceae). (6)                               | <b>Pneumo.</b> (b. or st.; Po), <b>Umbilic</b> (b.; Po and Cat), <b>Uterus</b> (b. or st.; Po), <b>Diarrhoea</b> (b.; Po), <b>Furunculosis, Pustule</b> (Sap; Cat), <b>Sinusitis, Rhinitis</b> (b.; Po), <b>Tonsillitis</b> (bk.; Garg and Po) (st. Garg or Garg and Po) |
| <i>Capsicum frutescens</i> L.<br>"ma'a 'oporo" (Solanaceae) (2)                                            | <b>Uterus</b> (f.; Po), <b>Pneumo.</b> (f.; Inh)                                                                                                                                                                                                                         |
| <i>Cenchrus caliculatus</i> Cav.<br>"piripiri" (Poaceae) (1)                                               | <b>V. diseases</b> (a.p.; Po and Cat)                                                                                                                                                                                                                                    |
| <i>Citrus × sinensis</i> (L.) Osbeck<br>"anani" (Rutaceae) (1)                                             | <b>Pneumo.</b> (l.; Po), <b>Leucorrhoea</b> (l.; Po)                                                                                                                                                                                                                     |
| <i>Cocos nucifera</i> L.<br>"ha'ari" (Arecaceae) (5)                                                       | <b>Pneumo.</b> (Heart (uto) or r.; Po), <b>Burn</b> (Milk; Bath), <b>Purge</b> (Copra dry; Po), <b>Sinusitis, Rhinitis</b> (Copra; Po), <b>V. diseases</b> (Copra; Po and Cat)                                                                                           |
| <i>Cyathula prostrata</i> (L.) Blume<br>"mata'ura" (Amaranthaceae) (2)                                     | <b>Uterus</b> (l.; Po), <b>V. diseases</b> (w.p.; Po and Cat)                                                                                                                                                                                                            |
| <i>Cyclophyllum barbatum</i> (G.Forst.) N.Hallé & J.Florence "toro'e'a" or "torote'a" (Rubiaceae) (2)      | <b>Conjunctivitis</b> (l.; In eyes), <b>Furunculosis, Pustule</b> (b.; Bath)                                                                                                                                                                                             |
| <i>Cyperus javanicus</i> Houtt.<br>"mo'u" (Cyperaceae) (1)                                                 | <b>Furunculosis, Pustule</b> (Apex of plant; Cat)                                                                                                                                                                                                                        |
| <i>Dichrocephala integrifolia</i> (L.f.) Kuntze "ta'ata'ahiara" (Asteraceae) (4)                           | <b>Pneumo.</b> (Apex of plant; Po), <b>Uterus</b> (Apex; Po), <b>Heartburn</b> (Apex; Po), <b>V. Cutaneous symptoms</b> (w.p.; Po)                                                                                                                                       |

|                                                                                    |                                                                                                                                                                                                                                                                                                                                                                                                                                                                                                           |
|------------------------------------------------------------------------------------|-----------------------------------------------------------------------------------------------------------------------------------------------------------------------------------------------------------------------------------------------------------------------------------------------------------------------------------------------------------------------------------------------------------------------------------------------------------------------------------------------------------|
| <i>Emilia fosbergii</i> Nicolson<br>“ma'a rapiti” (Asteraceae) (1)                 | <b>Wound, Abscess</b> (l.; Cat)                                                                                                                                                                                                                                                                                                                                                                                                                                                                           |
| <i>Gardenia taitensis</i> DC. “tiare tahiti”<br>(Rubiaceae) (6)                    | <b>"Crumpled lung"</b> (b.; Po), <b>Pneumo.</b> (b. and/or fl.; Po), <b>Burn</b> (fl. and/or b. or l. Bath), <b>Conjunctivitis</b> (fl.; In eye), <b>Cystitis</b> (fl. and/or b. or l.; Po) <b>Furunculous, Pustule</b> (fl. and/or b. or l.; Po or Po and Cat.), <b>Heartburn</b> (fl. and/or b.; Po), <b>Leucorrhoea</b> (l.; Po), <b>Sinusitis; Rhinitis</b> (fl.; Inh), <b>V. Cutaneous symptoms</b> (b.; Bath or Cat) (fl. and/or b.; Po and Cat), <b>Wound, Abscess</b> (fl. and/or b.; Po and Cat) |
| <i>Heliotropium arboreum</i> (Blanco)<br>Mabb. “tahinu” (Boraginaceae) (7)         | <b>Acne</b> (b.; ND), <b>Pneumo.</b> (b.; Po), <b>Tonsillitis</b> (b.; Garg and Po) (l.; Po)                                                                                                                                                                                                                                                                                                                                                                                                              |
| <i>Hibiscus rosa-sinensis</i> L.<br>“ ‘aute” (Malvaceae) (3)                       | <b>Burn</b> (l.; Bath), <b>Furunculous, Pustule</b> (l.; ND), <b>Wound, Abscess</b> (b.; Cat)                                                                                                                                                                                                                                                                                                                                                                                                             |
| <i>Leucas decedentata</i> (Willd.) Sm.<br>“niu” (Lamiaceae) (8)                    | <b>Pneumo.</b> (l. and st.; Po), <b>Conjunctivitis</b> (l.; Po), <b>Furunculous, Pustule</b> (l. and st.; Po), <b>Sinusitis, Rhinitis</b> (l. and st.; Po), <b>V. Cutaneous symptoms</b> (w.p.; Po), <b>V. diseases</b> (w.p.; Po and Cat)                                                                                                                                                                                                                                                                |
| <i>Mentha</i> spp.<br>“ ‘otime” (Lamiaceae) (1)                                    | <b>Sinusitis, Rhinitis</b> (b.; Po)                                                                                                                                                                                                                                                                                                                                                                                                                                                                       |
| <i>Momordica charantia</i> L.<br>“fuka” (Cucurbitaceae) (1)                        | <b>Mycosis</b> (Vine; Bath)                                                                                                                                                                                                                                                                                                                                                                                                                                                                               |
| <i>Morinda citrifolia</i> L.<br>“nono” or “noni” (Rubiaceae). (5)                  | <b>Pneumo.</b> (f.; Inh), <b>Burn</b> (f. without seeds; Cat), <b>Furunculous, Pustule</b> (f. with fl.; Cat), <b>Tonsillitis</b> (f. with fl.; Po or Po and Cat), <b>Wound, Abscess</b> (f. without seeds; Cat)                                                                                                                                                                                                                                                                                          |
| <i>Ophioglossum reticulatum</i> L. “ti'apito”<br>(Ophioglossaceae) (5)             | <b>Acne</b> (l.; ND), <b>Uterus</b> (l.; Po), <b>Sinusitis, Rhinitis</b> (l. or w.p.; Po)                                                                                                                                                                                                                                                                                                                                                                                                                 |
| <i>Oxalis corniculata</i> L.<br>“ ‘ahi'a 'ava'ava” (Oxalidaceae) (3)               | <b>Tonsillitis</b> (l.; Garg and Po or Po) (Vine; Po)                                                                                                                                                                                                                                                                                                                                                                                                                                                     |
| <i>Paspalum orbiculare</i> G.Forst. “ ‘aretu”<br>(Poaceae) (1)                     | <b>V. diseases</b> (w.p.; Po and Cat)                                                                                                                                                                                                                                                                                                                                                                                                                                                                     |
| <i>Persicaria glabra</i> (Willd.) M.Gómez<br>“pitorea” (Polygonaceae) (2)          | <b>Pneumo.</b> (b. or l.; Po)                                                                                                                                                                                                                                                                                                                                                                                                                                                                             |
| <i>Premna serratifolia</i> L.<br>“ ‘avaro” (Lamiaceae) (1)                         | <b>Constipation</b> (l.; Po)                                                                                                                                                                                                                                                                                                                                                                                                                                                                              |
| <i>Ricinus communis</i> L.<br>“ND” (Euphorbiaceae) (1)                             | <b>Wound, Abscess</b> (alm.; Cat)                                                                                                                                                                                                                                                                                                                                                                                                                                                                         |
| <i>Rosa</i> sp. “roti fautau'a” (Rosaceae) (5)                                     | <b>Sinusitis, Rhinitis</b> (b. or fl.; Po)                                                                                                                                                                                                                                                                                                                                                                                                                                                                |
| <i>Saccharum officinarum</i> L.<br>“to patu” or “to tore” or “to” (Poaceae)<br>(6) | <b>Acne</b> (Internode; ND), <b>Pneumo.</b> (Internode; Po), <b>Umbilic.</b> (b. or Internode; Po and Cat), <b>Diarrhoea</b> (b. or Internode; Po), <b>Sinusitis; Rhinitis</b> (Internode; Po)                                                                                                                                                                                                                                                                                                            |
| <i>Schizostachyum glaucifolium</i> (Rupr.)<br>Munro “ ‘ofe” (Poaceae) (1)          | <b>V. diseases</b> (b.; Po and Cat)                                                                                                                                                                                                                                                                                                                                                                                                                                                                       |
| <i>Spondias dulcis</i> Parkinson “vi tahiti”<br>(Anacardiaceae) (7)                | <b>Pneumo.</b> (f. or l.; Po), <b>Conjunctivitis</b> (l.; Po or Po and Cat.), <b>Furunculous, Pustule</b> (l.; Po), <b>Oral mycosis</b> (l.; Po), <b>Otitis.</b> (l.; In ear), <b>V. Cutaneous symptoms</b> (f.; Po or Po and Cat)                                                                                                                                                                                                                                                                        |

*Terminalia catappa* L.  
“‘aua” (Combretaceae) (2)

**"Crumpled lung"** (l.; Po), **V. Cutaneous symptoms** (l.; Cat)

*Zingiber officinale* Roscoe  
“re’a tinito” (Zingiberaceae) (1)

**STD** (rh.; Po)

*Zingiber zerumbet* (L.) Roscoe ex Sm.  
“re’a moruru” (Zingiberaceae) (1)

**Sinusitis, Rhinitis** (rh.; Inh)

Table S2. Determination of antibiotic susceptibility of bacteria (MIC for Minimal Inhibitory Concentration). Gentamycin:  $S \leq 4$  mg/mL and  $R > 8$  mg/mL; Vancomycin:  $S \leq 4$  mg/mL and  $R > 16$  mg/mL; Amoxicillin:  $S \leq 4$  mg/mL et  $R > 16$  mg/mL. S: Sensible, R: Resistant and NA: no activity.

|                                       |            | CMI (mg/mL) |            |             |
|---------------------------------------|------------|-------------|------------|-------------|
|                                       |            | Gentamycin  | Vancomycin | Amoxicillin |
| <i>Enterococcus faecalis</i>          | C159-6     | 2.0         | 0,5        | 64          |
| <i>Enterococcus sp.</i>               | 8153       | 2.0         | 4.0        | 2.0         |
| <i>Mycobacterium paratuberculosis</i> | 5003       | 0,03        | 0,5        | 1.0         |
| <i>Staphylococcus aureus</i>          | 8146       | 0,5         | 1.0        | 4.0         |
| <i>Staphylococcus aureus</i>          | 8241       | 0,5         | 1.0        | 16          |
| <i>Staphylococcus aureus</i>          | ATCC 6538  | 0,25        | 1.0        | 0,125       |
| <i>Staphylococcus aureus</i>          | T28-1      | 0,5         | 1.0        | 2.0         |
| <i>Staphylococcus aureus</i>          | T17-4      | 0,5         | 1.0        | 1.0         |
| <i>Staphylococcus epidermidis</i>     | T46A1      | 0,06        | 2.0        | 1.0         |
| <i>Staphylococcus epidermidis</i>     | T19A1      | 32          | 2.0        | 16          |
| <i>Staphylococcus epidermidis</i>     | T21A5      | 0,06        | 2.0        | 16          |
| <i>Staphylococcus warneri</i>         | T12A12     | 0,06        | 4.0        | 1.0         |
| <i>Staphylococcus warneri</i>         | T26A1      | 0,06        | 2.0        | 0,25        |
| <i>Staphylococcus pettenkoferi</i>    | T47.A6     | 0,06        | 2.0        | 0,25        |
| <i>Streptococcus agalactiae</i>       | T38.2      | NA          | NA         | NA          |
| <i>Streptococcus agalactiae</i>       | T53C9      | 0,5         | 0,25       | 0,03        |
| <i>Streptococcus pyogenes</i>         | 16138      | 0,125       | 0,25       | 0,03        |
| <i>Streptococcus pyogenes</i>         | 16135      | 0,125       | 0,25       | 0,03        |
| <i>Corynebacterium striatum</i>       | T40A3      | 0,06        | 0,5        | 1.0         |
| <i>Citrobacter freundii</i>           | 11041      | 0,25        | NA         | 2.0         |
| <i>Citrobacter freundii</i>           | 10268      | NA          | NA         | NA          |
| <i>Escherichia coli</i>               | ATCC 25922 | 0,5         | NA         | 16          |
| <i>Escherichia coli</i>               | T20A1      | 0,25        | NA         | NA          |
| <i>Escherichia coli</i>               | 8138       | 0,5         | NA         | NA          |

|                               |            |      |    |    |
|-------------------------------|------------|------|----|----|
| <i>Escherichia coli</i>       | 8157       | 0,5  | NA | NA |
| <i>Enterobacter aerogenes</i> | 9004       | 0,5  | NA | NA |
| <i>Klebsiella pneumoniae</i>  | 10270      | 0,25 | NA | NA |
| <i>Klebsiella pneumoniae</i>  | 11016      | 8    | NA | NA |
| <i>Proteus mirabilis</i>      | 11060      | 0,5  | NA | 2  |
| <i>Proteus mirabilis</i>      | T28-3      | 0,25 | NA | 1  |
| <i>Pseudomonas aeruginosa</i> | 8131       | 1    | NA | NA |
| <i>Pseudomonas aeruginosa</i> | ATCC 27583 | 2    | NA | NA |
| <i>Pseudomonas aeruginosa</i> | 8129       | 0,03 | NA | NA |
| <i>Salmonella sp.</i>         | 11033      | 0,25 | NA | 2  |
